# Supplementary material for: Effects of Coenzyme Q10 on the Biomarkers (Hydrogen, Methane, SCFA and TMA) and Composition of the Gut Microbiome in Rats
Source: MDPI journal article supplement (doi:10.3390/ph16050686), 2023-05-02
Supplement: s1 [file s1]

**Figure S1.** Rarefaction curves.

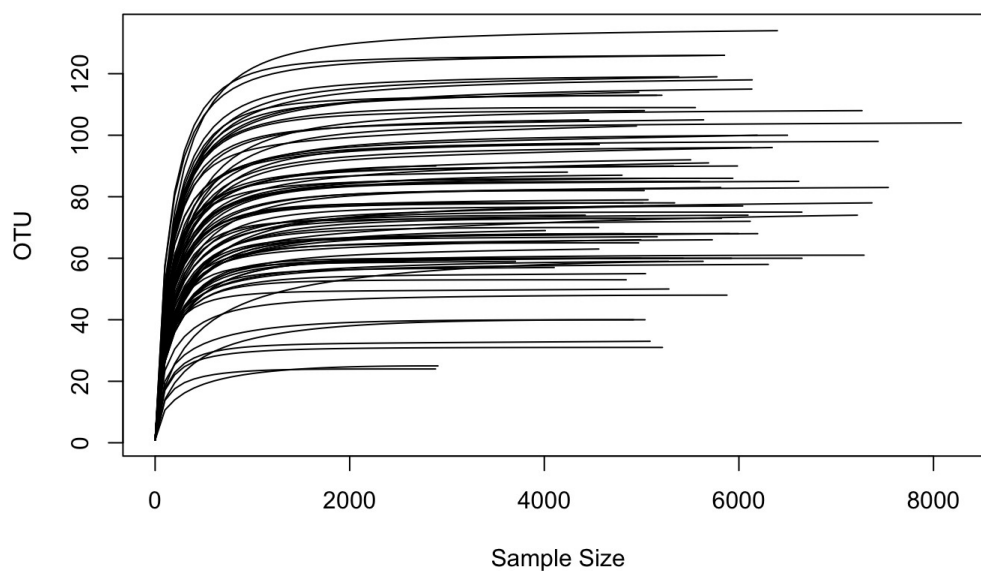

**Table S1.** Relative abundance of top phyla at pre- and post-treatment stages in all experimental groups.

|                   | <b>Control</b> |                | <b>Vehicle</b> |                | <b>CoQ10</b> |                |
|-------------------|----------------|----------------|----------------|----------------|--------------|----------------|
|                   | <b>Pre</b>     | <b>Post</b>    | <b>Pre</b>     | <b>Post</b>    | <b>Pre</b>   | <b>Post</b>    |
| Firmicutes        | 65,1535        | 75,50571428571 | 73,6765        | 79,18025       | 66,1734375   | 68,9211875     |
| Bacteroidota      | 27,37571428571 | 19,19233571428 | 17,00275       | 13,18883333333 | 20,2915625   | 22,8609375     |
| Actinobacteriota  | 1,975428571429 | 1,248928571428 | 1,625166666666 | 1,26725        | 2,371625     | 1,6203125      |
| Proteobacteria    | 0,673142857143 | 0,1665         | 0,45475        | 0,574583333333 | 0,5405       | 0,6205         |
| Campilobacterota  | 0,823857142857 | 0,958071428571 | 1,881416666666 | 1,217166666666 | 2,4218125    | 0,6204375      |
| Desulfobacterota  | 1,324928571428 | 0,723357142857 | 3,410666666666 | 1,455083333333 | 5,551        | 2,8890625      |
| Spirochaetota     | 2,291642857142 | 1,945428571428 | 1,373916666666 | 2,838583333333 | 2,0198       | 1,8905         |
| Unclassified taxa | 0,381785714285 | 0,259664285714 | 0,574833333333 | 0,278249999999 | 0,41499999   | 0,577062500000 |

**Table S2.** Analysis of differential abundance at genera level.

| Taxon                                   | control |        |          | vehicle |        |          | coenzyme Q10 |        |          |
|-----------------------------------------|---------|--------|----------|---------|--------|----------|--------------|--------|----------|
|                                         | ancombc | deseq2 | wilcoxon | ancombc | deseq2 | wilcoxon | ancombc      | deseq2 | wilcoxon |
| [Eubacterium] hallii group              | +       |        |          |         |        |          |              | +      |          |
| [Eubacterium] siraeum group             | +       |        |          |         |        |          |              |        |          |
| [Ruminococcus] torques group            |         |        |          |         |        |          | +            |        |          |
| Alistipes                               |         |        |          |         |        | +        | +            |        |          |
| Allobaculum                             |         |        |          | +       | +      | +        |              |        |          |
| Anaerobiospirillum                      | +       |        |          |         |        |          |              |        |          |
| Anaerovibrio                            |         |        |          |         |        |          |              | +      |          |
| Bifidobacterium                         | +       | +      | +        |         |        |          |              | +      |          |
| Blautia                                 |         |        |          |         |        | +        |              |        |          |
| Butyrivibrio                            |         |        |          |         |        | +        |              |        |          |
| Campylobacter                           |         |        |          | +       |        |          |              |        |          |
| Catenisphaera                           |         |        |          |         |        |          |              |        |          |
| Chlamydia                               | +       |        |          |         |        | +        |              |        |          |
| Christensenellaceae R-7 group           |         | +      |          |         | +      |          |              |        |          |
| Clostridia UCG-014                      |         |        |          |         | +      |          |              |        |          |
| Clostridium sensu stricto 1             |         | +      |          |         |        |          |              | +      |          |
| Colidextribacter                        | +       |        | +        |         |        |          |              |        |          |
| Coprococcus                             | +       |        |          |         |        | +        |              |        |          |
| Desulfovibrio                           |         |        |          |         |        |          |              | +      |          |
| Dorea                                   |         |        |          |         |        |          | +            | +      |          |
| Dubosiella                              |         |        |          |         |        |          | +            |        |          |
| Enterorhabdus                           |         |        |          | +       | +      |          | +            |        |          |
| Erysipelatoclostridium                  | +       | +      | +        |         | +      |          | +            |        | +        |
| Erysipelotrichaceae UCG-006             |         |        |          | +       |        |          |              |        |          |
| Eubacterium xylanophilum group          |         |        |          |         |        | +        |              |        |          |
| Faecalibacterium                        |         |        |          |         |        |          |              | +      |          |
| Faecalibaculum                          | +       |        |          |         |        |          |              |        |          |
| GWE2-31-10                              | +       |        |          |         |        |          | +            |        |          |
| Helicobacter                            |         |        |          |         |        |          | +            | +      | +        |
| Incertae Sedis                          | +       |        |          |         |        |          |              |        |          |
| Lachnospiraceae AC2044 group            | +       |        | +        | +       |        |          | +            |        | +        |
| Lachnospiraceae NK3A20 group            |         |        |          | +       |        |          |              |        |          |
| Lachnospiraceae ND3007 group            |         |        |          |         |        | +        |              |        |          |
| Lawsonia                                | +       |        |          | +       |        |          | +            | +      |          |
| Methanobrevibacter                      |         |        |          | +       | +      |          | +            | +      | +        |
| Mogibacterium                           |         |        |          | +       |        |          |              |        |          |
| Monoglobus                              |         |        |          | +       |        | +        |              |        | +        |
| Mucispirillum                           |         |        |          | +       |        | +        |              |        | +        |
| Mycoplasma                              | +       |        |          |         |        |          |              |        |          |
| Negativibacillus                        |         |        |          | +       |        |          |              |        |          |
| Olsenella                               |         |        |          |         |        | +        |              |        |          |
| Oscillibacter                           | +       |        |          | +       |        |          | +            |        |          |
| Oscillospira                            | +       |        |          |         |        | +        | +            |        |          |
| Parasutterella                          | +       |        |          | +       |        |          |              |        |          |
| Peptoclostridium                        | +       |        |          | +       |        | +        |              | +      |          |
| Peptococcus                             | +       |        |          | +       | +      | +        | +            |        |          |
| Prevotellaceae UCG-001 group            |         |        |          |         |        |          | +            |        |          |
| Prevotellaceae Ga6A1 group              |         |        |          |         |        | +        |              |        |          |
| Pygmaibacter                            |         |        |          | +       |        |          | +            | +      | +        |
| Rikenellaceae RC9 gut group             |         |        |          |         |        |          |              | +      |          |
| Roseburia                               |         |        |          |         |        |          | +            |        |          |
| Ruminococcus                            |         |        |          |         |        |          | +            | +      |          |
| Senegalimassilia                        | +       |        |          | +       | +      |          | +            |        |          |
| Shuttleworthia                          | +       |        |          |         |        |          | +            |        |          |
| Solobacterium                           |         |        | +        |         |        |          | +            |        |          |
| Staphylococcus                          |         |        |          | +       |        |          |              |        |          |
| Streptococcus                           |         |        |          |         |        | +        |              |        |          |
| Subdoligranulum                         |         |        |          |         |        |          |              | +      |          |
| Sutterella                              | +       |        |          |         |        |          |              |        |          |
| Turicibacter                            | +       | +      |          | +       |        |          |              | +      | +        |
| Erysipelatoclostridiaceae UCG-004 group |         |        |          |         |        | +        |              |        |          |
| Oscillospiraceae UCG-005 group          |         | +      |          |         | +      | +        |              |        |          |
| Ureaplasma                              |         |        |          | +       |        |          |              |        | +        |

'+' means that adjusted p-value for the chosen method is < 0.05; '+\*' means that unadjusted p-value for the method is < 0.05, while adjusted is > 0.05; blank cells - both adjusted and unadjusted p-values > 0.05; taxa for which at least to algorythms showed differential abundance before and after treatment ara highlighted with pale green
